# Supplementary material for: Impact of inner ear malformation and cochlear nerve deficiency on the development of auditory-language network in children with profound sensorineural hearing loss
Source: eLife. 2023 Sep 12;12:e85983. doi: 10.7554/eLife.85983 (PMC10497283; doi:10.7554/eLife.85983)
Supplement: Figure 4—source data 1. [file elife-85983-fig4-data1.xlsx]

## Sheet: Sheet1
Pearson Correlation between cn.VIII median contrast values and fibre metrics of central pathways.
Correlations		The entire central auditory pathway			TB			LL			BIC			AR			Significantly impaired auditory areas
		FC	FD	FDC	FC	FD	FDC	FC	FD	FDC	FC	FD	FDC	FC	FD	FDC	FC	FD	FDC
Cn.VIII median contrast value	r	0.41	0.41	0.34	0.48	0.45	0.43	0.58	0.38	0.44	0.59	0.35	0.45	0.35	0.35	0.34	0.49	0.58	0.54
	p	0.0973	0.0973	0.1416	0.0625	0.0751	0.0857	0.0336	0.119	0.0797	0.0306	0.131	0.0693	0.1356	0.131	0.1416	0.0576	0.0322	0.0381
	pFWE	0.4996	0.5011	0.6361	0.3521	0.4243	0.461	0.1861	0.5741	0.4402	0.1724	0.6197	0.4151	0.6216	0.6197	0.6361	0.3328	0.1907	0.2563
Correlations		The entire language pathway			Left dorsal I			Right dorsal I			Left dorsal II			Right dorsal II			Left ventral I			Right ventral I			Left ventral II			Right ventral II			Significantly impaired language areas
		FC	FD	FDC	FC	FD	FDC	FC	FD	FDC	FC	FD	FDC	FC	FD	FDC	FC	FD	FDC	FC	FD	FDC	FC	FD	FDC	FC	FD	FDC	FC	FD	FDC
Cn.VIII median contrast value	r	0.42	0.57	0.41	0.38	0.65	0.43	0.42	0.56	0.39	0.39	0.65	0.43	0.35	0.55	0.36	0.51	0.59	0.46	0.45	0.44	0.36	0.52	0.6	0.46	0.44	0.43	0.35	0.43	0.8	0.6
	p	0.0903	0.0322	0.0948	0.1142	0.0177	0.0798	0.095	0.0339	0.1056	0.1108	0.0186	0.0816	0.1367	0.0385	0.1241	0.049	0.029	0.0673	0.076	0.0798	0.1281	0.047	0.0281	0.0639	0.0781	0.0833	0.1338	0.0907	0.0011	0.0278
	pFWE	0.4695	0.194	0.4928	0.5501	0.1057	0.4492	0.4774	0.2081	0.5412	0.5426	0.1072	0.4476	0.6212	0.2305	0.5958	0.305	0.1762	0.4056	0.4192	0.4313	0.6102	0.2889	0.1685	0.3907	0.4266	0.4457	0.6237	0.4617	0.0177	0.1614
