# Supplementary material for: Impact of inner ear malformation and cochlear nerve deficiency on the development of auditory-language network in children with profound sensorineural hearing loss
Source: eLife. 2023 Sep 12;12:e85983. doi: 10.7554/eLife.85983 (PMC10497283; doi:10.7554/eLife.85983)
Supplement: Figure 4—source data 2. — (a) Moderation analysis of the effect of cn.VIII median contrast values on the relationship between auditory pathway fibre density (FD) and age. (b) Moderation analysis of the effect of cn.VIII median contrast values on the relationship between language pathway FD and age. (c) Moderation analysis of the effect of cn.VIII median contrast values on the relationship between auditory pathway FD and age, controlling gender, gestational weeks, and birth weights. (d) Moderation analysis of the effect of cn.VIII median contrast values on the relationship between language pathway FD and age, controlling gender, gestational weeks, and birth weights. [file elife-85983-fig4-data2.xlsx]

## Sheet: Sheet1
a. Moderation analysis of the effect of cn.VIII median contrast values on the relationship between auditory pathway FD and age.
	B	SE	Beta	t	p	CI
Constant	0.333	0.012		27.277	<0.001	(0.305, 0.361)
Cn.VIII median contrast value	-0.007	0.013	-0.094	-0.548	0.598	(-0.038, 0.023)
Age	0.063	0.012	0.809	5.037	0.001	(0.034, 0.091)
Interaction	-0.036	0.015	-0.379	-2.345	0.047	(-0.071, -0.001)
b. Moderation analysis of the effect of cn.VIII median contrast values on the relationship between language pathway FD and age.
	B	SE	Beta	t	p	CI
Constant	0.38	0.012		31.914	<0.001	(0.352, 0.407)
Cn.VIII median contrast value	0.015	0.013	0.14	1.123	0.294	(-0.015, 0.044)
Age	0.081	0.012	0.782	6.709	<0.001	(0.053, 0.109)
Interaction	-0.038	0.015	-0.298	-2.546	0.034	(-0.072, -0.004)
c. Moderation analysis of the effect of cn.VIII median contrast values on the relationship between auditory pathway FD and age, controlling gender, gestational weeks, and birth weights.
	B	SE	Beta	t	p	CI
Constant	-0.002	0.016		-1.4	0.892	(-0.040, 0.035)
Cn.VIII median contrast value	<0.001	<0.001	0.209	0.71	0.498	(<0.001, 0.001)
Age	0.001	0.001	0.526	1.715	0.125	(<0.001, 0.003)
Interaction	<0.001	<0.001	0.199	0.66	0.528	(<0.001, 0.001)
d. Moderation analysis of the effect of cn.VIII median contrast values on the relationship between language pathway FD and age, controlling gender, gestational weeks, and birth weights.
	B	SE	Beta	t	p	CI
Constant	-0.005	0.016		<0.001	1	(-0.039, 0.039)
Cn.VIII median contrast value	<0.001	<0.001	0.191	0.788	0.453	(<0.001, 0.001)
Age	0.002	0.001	0.692	2.744	0.025	(<0.001, 0.004)
Interaction	<0.001	<0.001	0.388	1.569	0.155	(<0.001, 0.001)
