# Supplementary material for: Impact of inner ear malformation and cochlear nerve deficiency on the development of auditory-language network in children with profound sensorineural hearing loss
Source: eLife. 2023 Sep 12;12:e85983. doi: 10.7554/eLife.85983 (PMC10497283; doi:10.7554/eLife.85983)
Supplement: Figure 5—source data 1. [file elife-85983-fig5-data1.xlsx]

## Sheet: Sheet1
Postoperative outcomes of ABI and CI recipients.
Patients		Surgery		PTA at six months post-activation	Scales at device activation				Scales at six months post-activation				Scale changes over the 6-month intervening period
Gender	Age	Implant	Side		CAP	SIR	IT-MAIS	MUSS	CAP	SIR	IT-MAIS	MUSS	CAP	SIR	IT-MAIS	MUSS
	(months)
M	26	ABI	Right	90	0	1	0	0	1	1	6	1	1	0	6	1
M	24	CI	Bilateral	31	0	1	1	4	5	1	26	9	5	0	25	5
F	56	CI	Left	40	3	1	28	20	6	3	40	31	3	2	12	11
F	65	CI	Bilateral	25	6	3	23	18	7	4	40	35	1	1	17	17
M	32	CI	Right	40	1	1	0	0	5	2	27	13	4	1	27	13
M	29	ABI	Right	87.5	0	1	0	0	1	1	3	5	1	0	3	5
M	14	CI	Bilateral	NA	0	1	0	1	4	1	20	5	4	0	20	4
M	44	CI	Right	37.5	5	1	16	12	5	1	35	17	0	0	19	5
F	9	CI	Bilateral	38.75	1	1	3	2	3	1	22	5	2	0	19	3
Abbreviations: PTA, pure tone average; CAP, Categories of Auditory Performance; SIR, Speech Intelligibility of Rating; IT-MAIS, Infant-toddler Meaningful Auditory Integration Scale; MUSS, Meaningful Use of Speech Scale.
