# Supplementary material for: Impact of inner ear malformation and cochlear nerve deficiency on the development of auditory-language network in children with profound sensorineural hearing loss
Source: eLife. 2023 Sep 12;12:e85983. doi: 10.7554/eLife.85983 (PMC10497283; doi:10.7554/eLife.85983)
Supplement: Supplementary file 1. [file elife-85983-supp1.xlsx]

## Sheet: Sheet1
Supplementary file 1 - Audiological characteristics of patients with congenital bilateral profound sensorineural hearing loss.
Patients		Newborn Hearing Screening		Initial Diagnosis		Initial Intervention		Recent Preoperative Audiometric Examination
Gender	Age	Primary	Secondary	Age of diagnosis	Click AC-ABR at diagnosis	Intervention measures	Intervention starting age	DPOAE	Click AC-ABR	Click BC-ABR	0.5-4 kHz PTA	Tympanometry type
	(months)			(months)	(left; right)		(months)	(both sides)	(both sides)	(both sides)	(both sides)	(left; right)
M	26	Fail	Fail	6	>95; >95dB nHL	None	NA	Not evoked	>95 dB nHL	>45 dB nHL	>95 dB HL	A; A
M	24	Pass	NA	23	>95; >95dB nHL	None	NA	Not evoked	>95 dB nHL	>45 dB nHL	>95 dB HL	A; A
F	56	Fail	Fail	24	NA	Bilateral HA	24	Not evoked	>95 dB nHL	>45 dB nHL	>95 dB HL	As; As
F	65	Fail	Fail	3	90; 85 dB nHL	Bilateral HA	7	Not evoked	>95 dB nHL	>45 dB nHL	>95 dB HL	As; As
M	17	Fail	Fail	3	>95; >95dB nHL	None	NA	Not evoked	>95 dB nHL	>45 dB nHL	>95 dB HL	A; A
M	32	Fail	Fail	30	>95; >95 dB nHL	None	NA	Not evoked	>95 dB nHL	>45 dB nHL	>95 dB HL	As; As
M	29	Fail	Fail	6	>95; >95dB nHL	Bilateral HA	6	Not evoked	>95 dB nHL	>45 dB nHL	>95 dB HL	As; As
M	14	Fail	Fail	4	80; >95 dB nHL	None	NA	Not evoked	>95 dB nHL	>45 dB nHL	>95 dB HL	As; As
M	6	Fail	Fail	3	>95; >95 dB nHL	None	NA	Not evoked	>95 dB nHL	>45 dB nHL	NA	As; As
F	72	NA	NA	1	>95; >95 dB nHL	None	NA	Not evoked	NA	NA	>95 dB HL	C; A
M	44	Fail	Fail	3	70; 75 dB nHL	Bilateral HA	12	Not evoked	>95 dB nHL	>45 dB nHL	>95 dB HL	A; A
F	9	Fail	Fail	3	>95; >95 dB nHL	Bilateral HA	3	Not evoked	>95 dB nHL	>45 dB nHL	NA	As; As
M	8	Fail	Fail	3	>95; >95 dB nHL	None	NA	Not evoked	>95 dB nHL	>45 dB nHL	NA	B; As
