# Supplementary material for: Impact of inner ear malformation and cochlear nerve deficiency on the development of auditory-language network in children with profound sensorineural hearing loss
Source: eLife. 2023 Sep 12;12:e85983. doi: 10.7554/eLife.85983 (PMC10497283; doi:10.7554/eLife.85983)
Supplement: Supplementary file 2. [file elife-85983-supp2.xlsx]

## Sheet: Sheet1
Supplementary file 2 - Genetic profile of patients with congenital bilateral profound sensorineural hearing loss.
Patients		Family history		Full-body examination						Genetic testing				Syndromic/ Non-syndromic
Gender	Age (months)	Congenital hearing loss	Hereditary diseases	Skull and facial malformations	Musculoskeletal system	Heart, renal, and thyroid function	Metabolic abnormalities	Visual impairment	Intracranial lesion	Panel of tested genes	Detected abnormal gene	Identified mutations	Genotype
									in Head CT/MRI
M	26	Negative	Negative	None	Normal	Normal	None	None	Not detected	GJB2 and MTR	Not detected	NA	NA	Non-syndromic
M	24	Negative	Negative	None	Normal	Normal	None	None	Not detected	Comprehensive panel	OTOF	c.5098G>C, c.1273C>T	Heterozygous	Non-syndromic
F	56	Negative	Negative	None	Normal	Normal	None	None	Not detected	GJB2, MTR, SLC26A4, USH2A	GJB2	c.235delC	Homozygous	Non-syndromic
F	65	Negative	Negative	None	Normal	Normal	None	None	Not detected	GJB2 and MTR	Not detected	NA	NA	Non-syndromic
M	17	Negative	Negative	None	Normal	Normal	None	None	Not detected	NA	NA	NA	NA	Non-syndromic
M	32	Negative	Negative	None	Normal	Normal	None	None	Not detected	GJB2 and MTR	GJB2	c.235delC, c.299_300delAT	Heterozygous	Non-syndromic
M	29	Negative	Negative	None	Normal	Normal	None	None	Not detected	NA	NA	NA	NA	Non-syndromic
M	14	Negative	Negative	None	Normal	Normal	None	None	Not detected	NA	NA	NA	NA	Non-syndromic
M	6	Negative	Negative	None	Normal	Normal	None	None	Not detected	NA	NA	NA	NA	Non-syndromic
F	72	Negative	Negative	None	Normal	Normal	None	None	Not detected	NA	NA	NA	NA	Non-syndromic
M	44	Negative	Negative	None	Normal	Normal	None	None	Not detected	GJB2 and MTR	Not detected	NA	NA	Non-syndromic
F	9	Negative	Negative	None	Normal	Normal	None	None	Not detected	Comprehensive panel	MYO15A	c.4109G>A, c.4519C>T	Heterozygous	Non-syndromic
M	8	Negative	Negative	None	Normal	Normal	None	None	Not detected	NA	NA	NA	NA	Non-syndromic
